# Supplementary material
Source: PubMed Central journal article supplement (PMC490009)

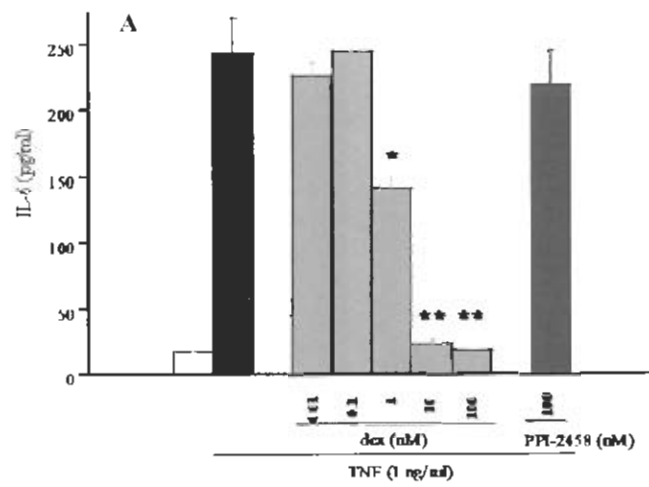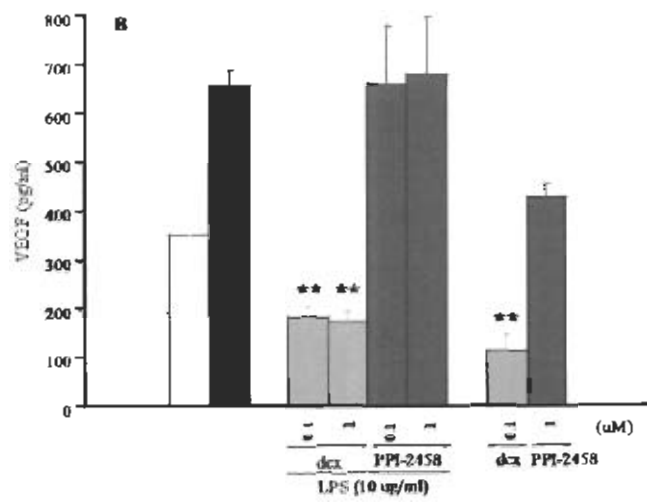

Supplement: pnas_101_29_10768__3.pdf [file pnas_101_29_10768__3.pdf]
